# Supplementary material for: Cu(ii) and Ni(ii) dioxotetraamine complexes integrated with tetrathiafulvalene moiety; structures and solution chemistry
Source: Royal Society of Chemistry journal article supplement (doi:10.1039/b921745b), 2010-01-01
Supplement: b921745b.pdf [file b921745b.pdf]

**SI materials for Paper:**

**Cu(II) and Ni(II) dioxotetraamine complexes integrated with  
tetrathiafulvalene moiety, structures and solution chemistry**

Zhe-Jun Lu , Jin-Po Wang , Qin-Yu Zhu \* , Li-Bin Huo , Yu-Rong Qin, and Jie Dai\*

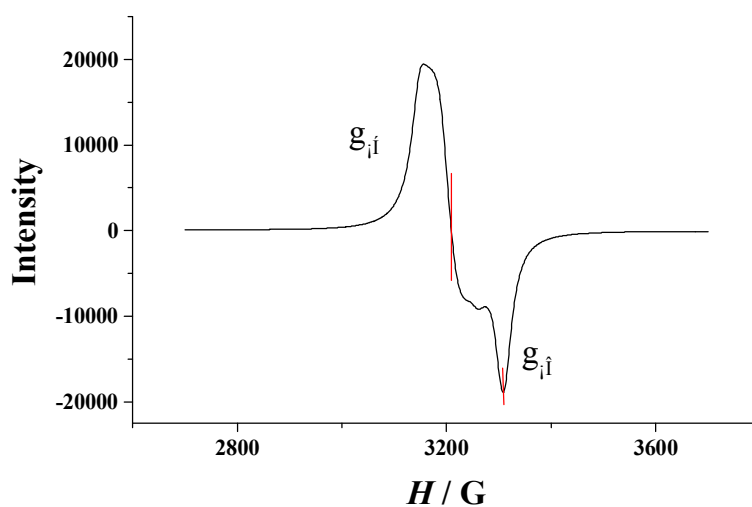

**SI-Fig. 1.** ESR spectra of **1** measured using powder sample at 110 K.

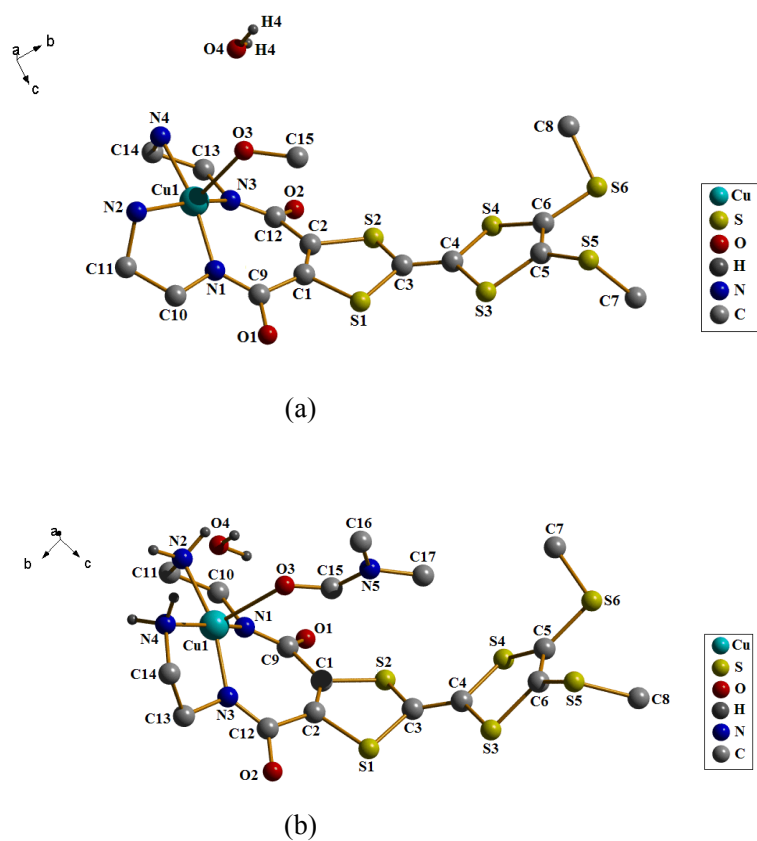

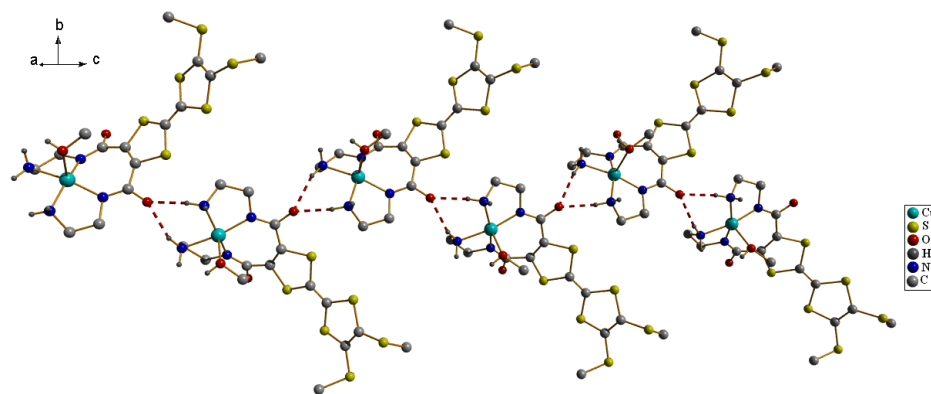

(a)

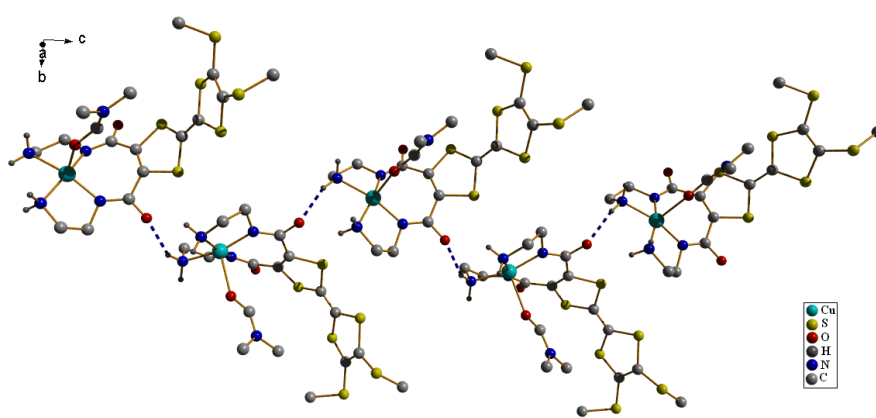

(b)

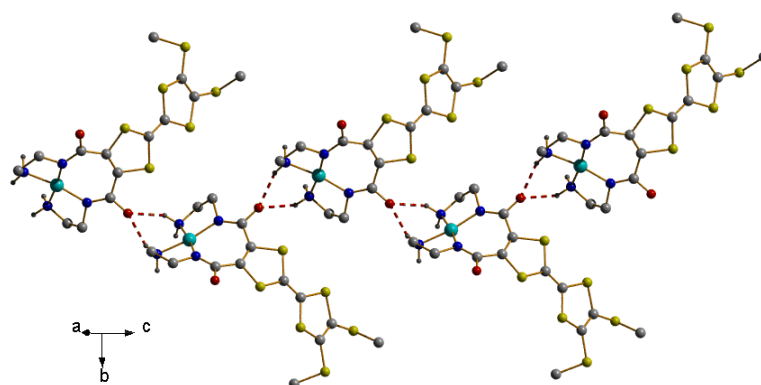

(c)

**SI-Fig. 3.** Similar to Figure 2, the band structure is also found in compounds **2-4** (**2**, **a**; **3**, **b**; **4**, **c**), that is the fundamental character of molecular arrangement for these type of compounds..

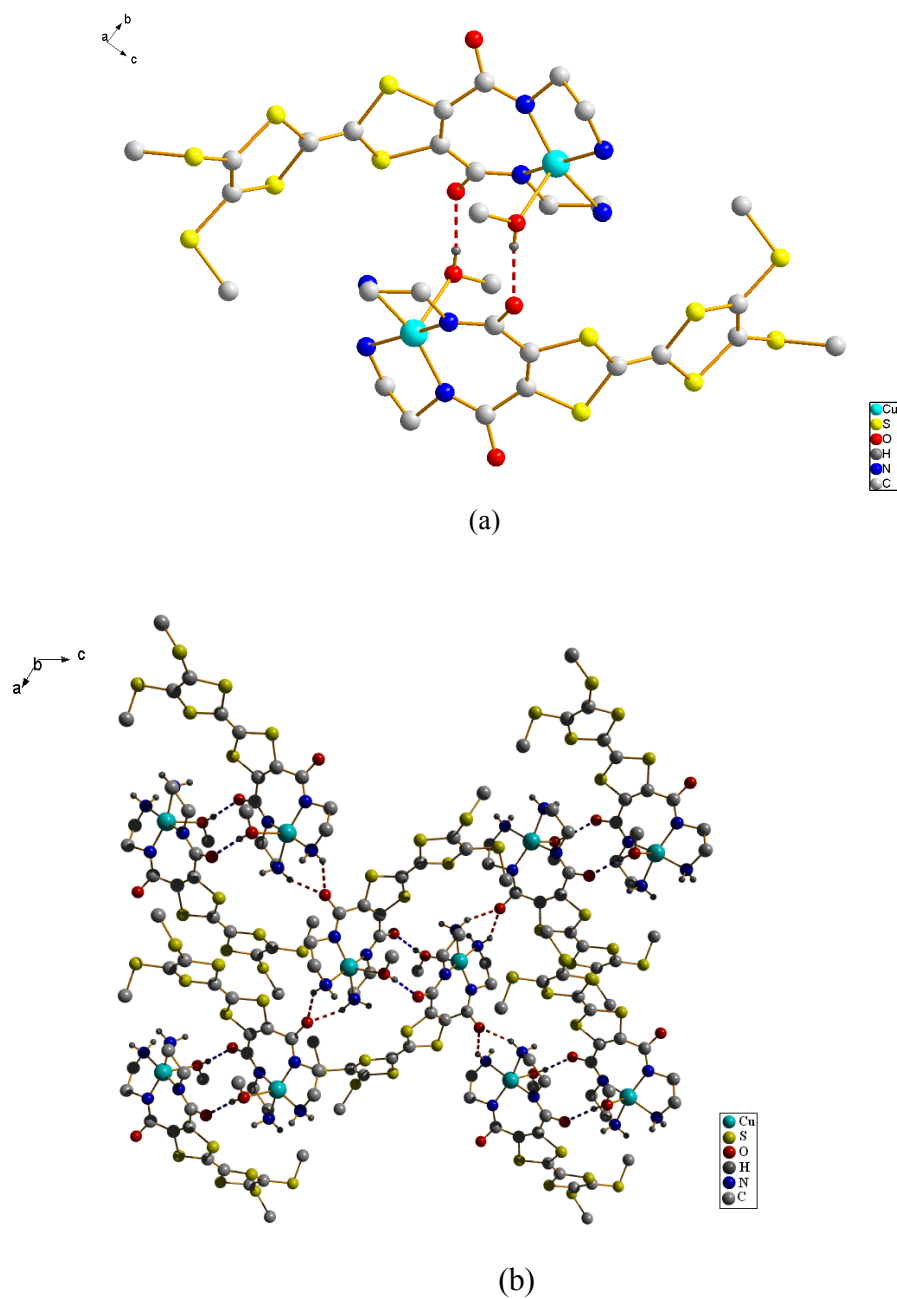

**SI-Fig. 4.** Cooperating with the N1–H1A···O2 and N2–H2B···O2 hydrogen bonds, hydrogen bonds that involve the imido oxygen atoms and the OH groups of methanol molecules (a) link the molecules of **1** into a 2-D aggregate (b).

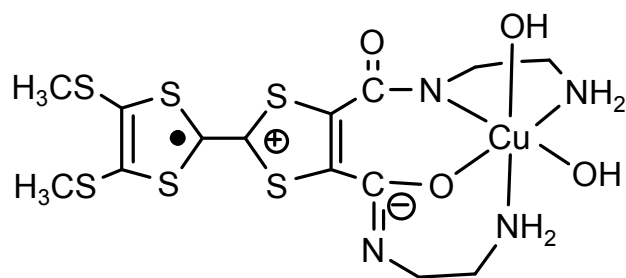

**SI-Fig. 5.** Proposed structure of the TTF oxidized Cu(II) complex.

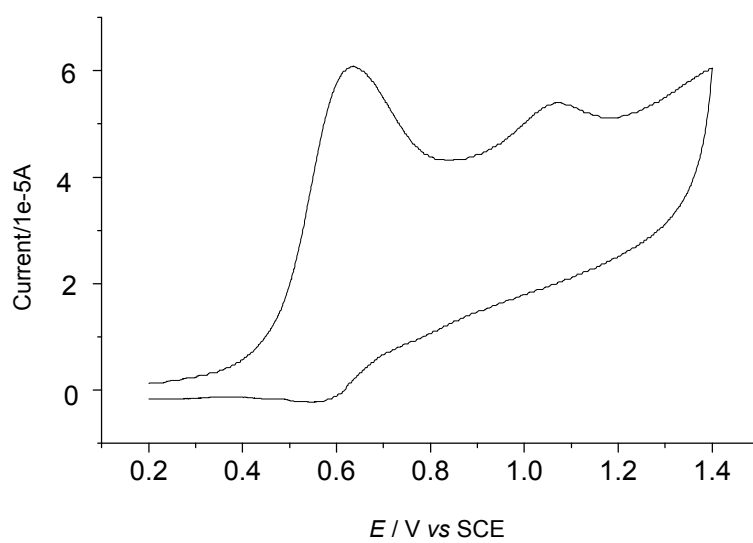

**SI-Fig. 6.** Irreversible CV curve of the free ligand.
